# Supplementary material for: Unraveling the habitat preferences, ecological drivers, potential hosts, and auxiliary metabolism of soil giant viruses across China
Source: PubMed Central journal article supplement (PMC11265010; doi:10.1186/s40168-024-01851-8), 2024-07-22
Supplement: 40168_2024_1851_MOESM2_ESM.pdf [file 40168_2024_1851_MOESM2_ESM.pdf]

1 *Supplementary figures for*

2  
3 **Unravelling the habitat preferences, ecological drivers, potential hosts and**  
4 **auxiliary metabolism of soil giant viruses across China**

5  
6 Jie-Liang Liang<sup>1,†</sup>, Shi-wei Feng<sup>1,†</sup>, Pu Jia<sup>1</sup>, Jing-li Lu<sup>1</sup>, Xinzhu Yi<sup>1</sup>, Shao-ming Gao<sup>2</sup>,  
7 Zhuo-hui Wu<sup>1</sup>, Bin Liao<sup>2</sup>, Wen-sheng Shu<sup>1</sup> & Jin-tian Li<sup>1,\*</sup>

8  
9 <sup>1</sup>Institute of Ecological Science, Guangzhou Key Laboratory of Subtropical  
10 Biodiversity and Biomonitoring, Guangdong Provincial Key Laboratory of  
11 Biotechnology for Plant Development, School of Life Sciences, South China Normal  
12 University, Guangzhou 510631, PR China

13 <sup>2</sup>School of Life Sciences, Sun Yat-sen University, Guangzhou 510275, PR China

14  
15 Jie-Liang Liang: liangjl@m.scnu.edu.cn

16 Shi-wei Feng: 2018022499@m.scnu.edu.cn

17 Pu Jia: pjia@m.scnu.edu.cn

18 Jing-li Lu: 2018010179@m.scnu.edu.cn

19 Xinzhu Yi: yizinzhu@m.scnu.edu.cn

20 Shao-ming Gao: gaoshaom@mail2.sysu.edu.cn

21 Zhuo-hui Wu: 2019022501@m.scnu.edu.cn

22 Bin Liao: liaobin2005@126.com

23 Wen-sheng Shu: shuwensheng@m.scnu.edu.cn

24 Jin-tian Li: lijintian@m.scnu.edu.cn

25

26 †These two authors contributed equally to this work.

27

28 \*Corresponding author:

29 School of Life Sciences, South China Normal University, Guangzhou 510631, PR

30 China

31 E-mail: [lijintian@m.scnu.edu.cn](mailto:lijintian@m.scnu.edu.cn)

32 Tel.: +86 20 85211850; Fax: +86 20 85211850

33

34 **Running title:** Biogeography and ecology of soil giant viruses

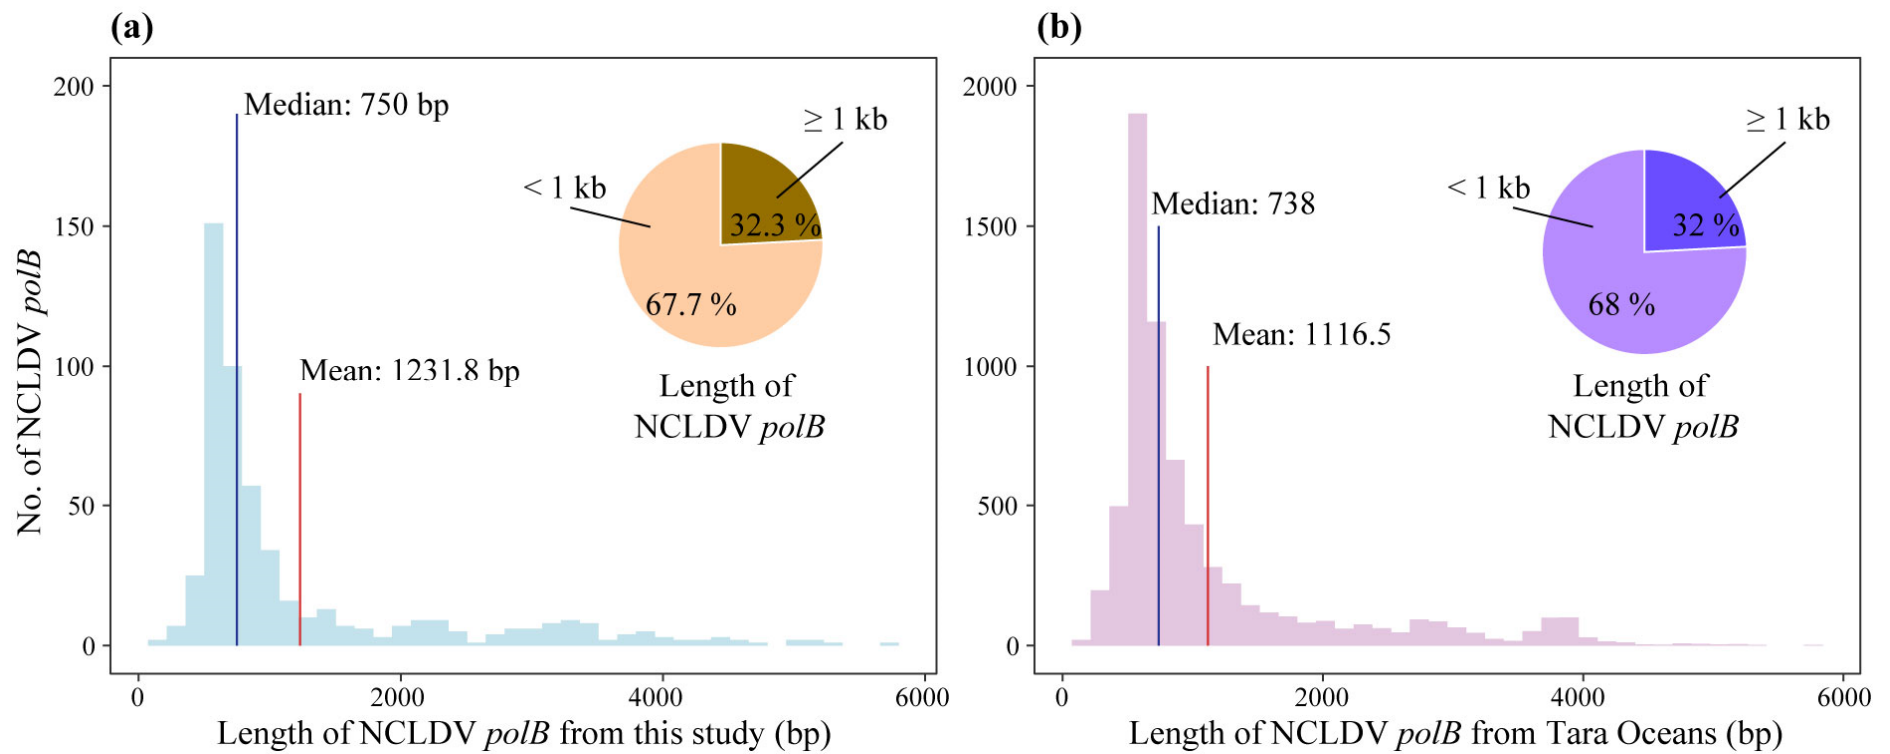

35

36 **Supplementary Figure 1. Length distributions of NCLDV *polB* sequences recovered from this study (a) and from Tara Oceans (b).** The pie

37 charts shown in the insets denote the percentages of *polB* sequences  $\geq 1$  kb and  $< 1$  kb. The *polB* sequences from Tara Oceans were obtained from

38 Endo *et al.* [1].

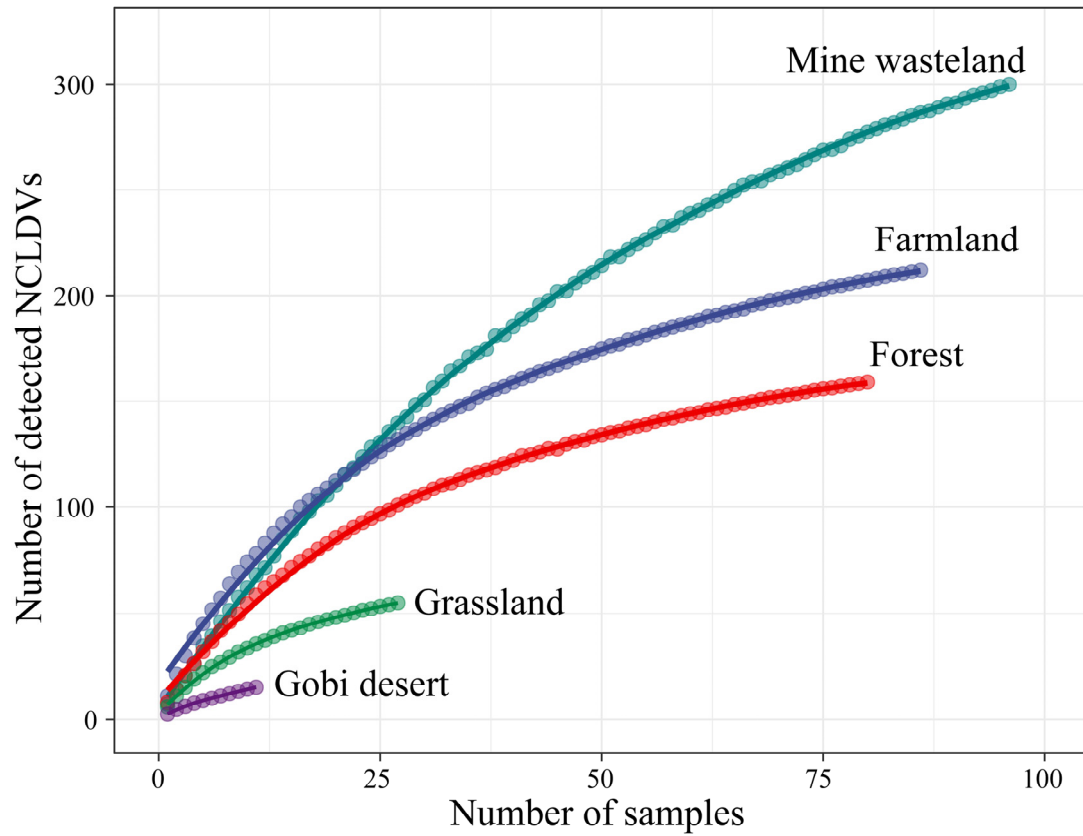

39

40 **Supplementary Figure 2. Sample-size dependence of the observed NCLDV**

41 **phylotypes in this study.** Sample-based rarefaction curves showing accumulated

42 richness of NCLDV *polB* genes detected in individual habitat types.



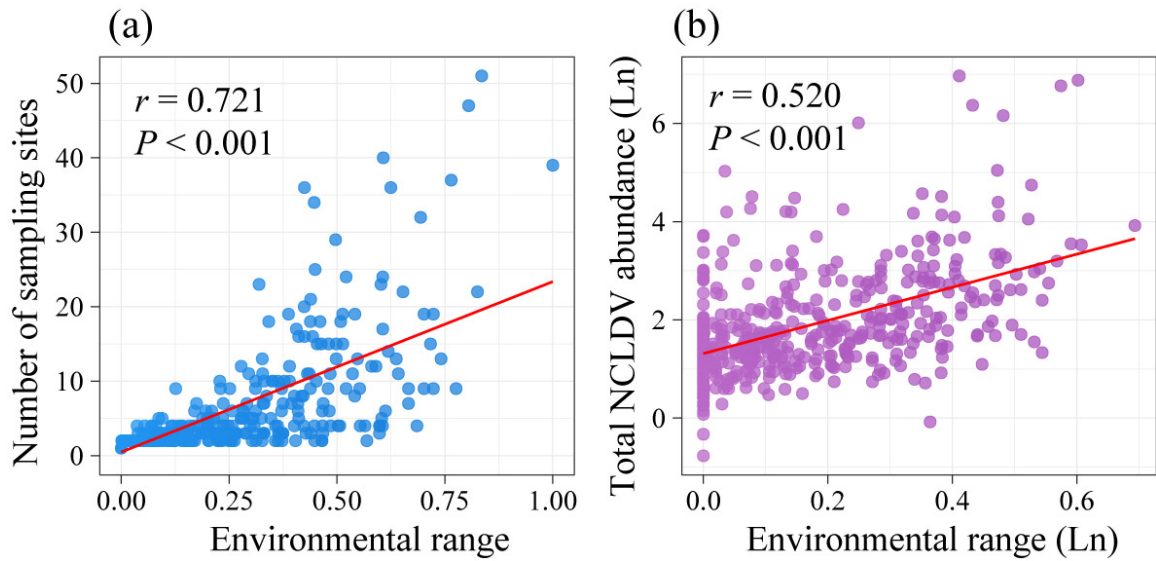

43

44 **Supplementary Figure 3. Relationships between environmental ranges of**

45 **individual NCLDV phylotypes and the numbers of sampling sites where they**

46 **occurred (a) or the total abundances of individual phylotypes in all sampling sites**

47 **(b).** Each dot in each panel denotes a NCLDV phylotype. The color intensity of a given

48 dot represents the number of habitat types where that NCLDV phylotype could be

49 recovered. The solid red lines represent the linear regression models with statistically

50 significant Pearson coefficients ( $P < 0.001$ ). The total abundance of each phylotype and

51 environmental range in (b) are normalized by logarithm.

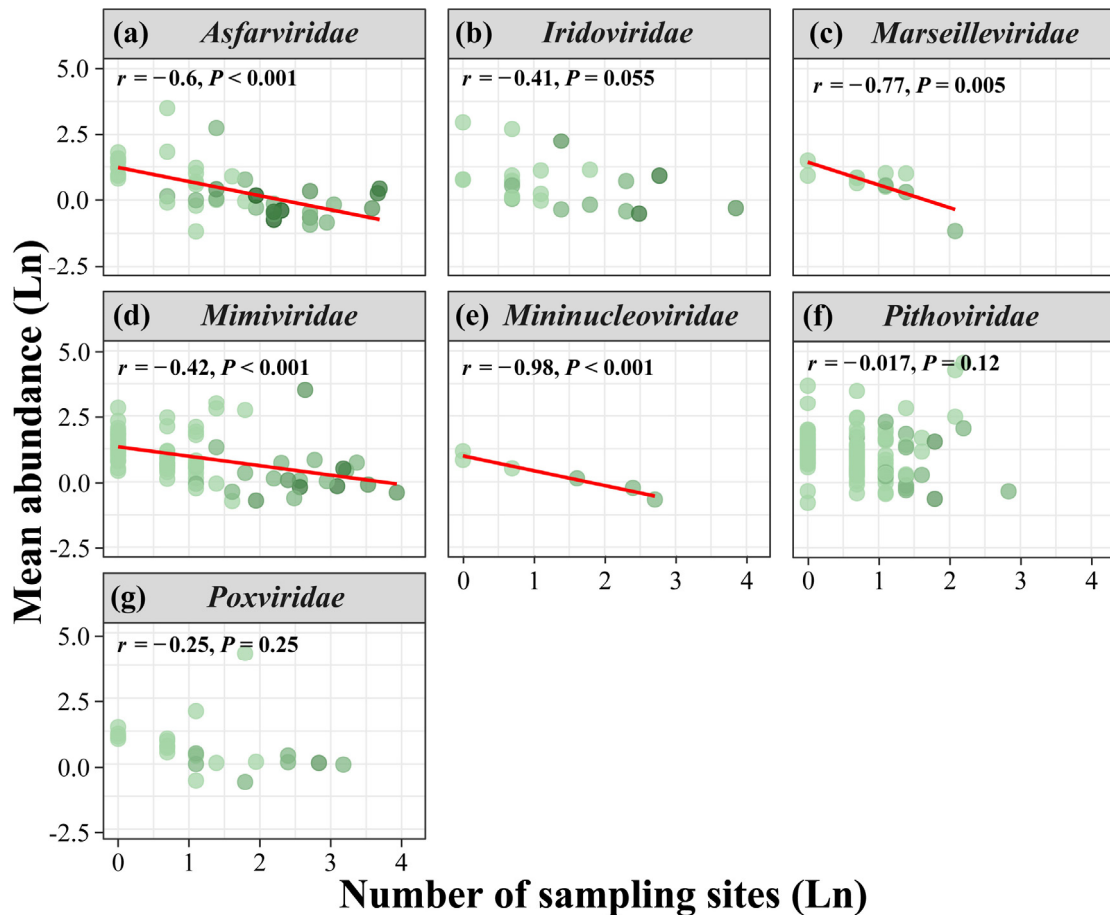

52

53 **Supplementary Figure 4. Correlations between average abundances of the**

54 **NCLDV phylotypes belonging to individual families and the numbers of sampling**

55 **sites where the corresponding phylotypes could be detected.** Each dot in each panel

56 denotes a NCLDV phylotype. The color intensity of a given dot represents the number

57 of habitats where that NCLDV phylotype could be recovered. The solid red lines

58 represent the linear regression with statistically significant Pearson coefficients ( $P <$

59 0.01). The phylotypes affiliated with *Phycodnaviridae* and *Prasinoviridae* were

60 excluded for analysis due to the limited number of sampling sites ( $n < 3$ ) where these

61 phylotypes could be detected.

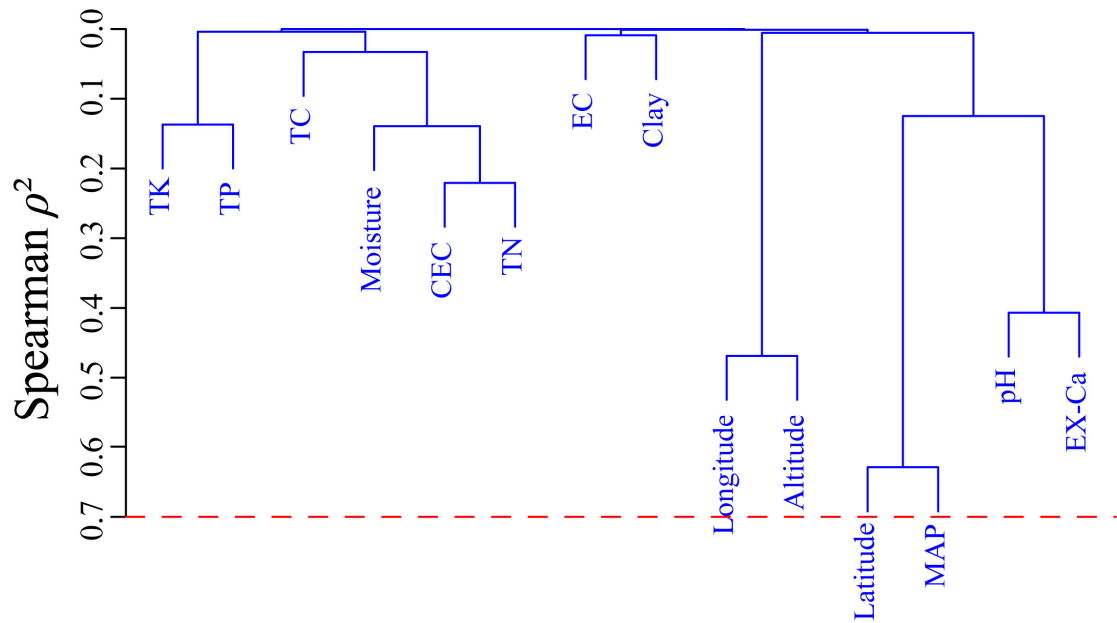

62

63 **Supplementary Figure 5. Variable clustering for assessment of the environmental**

64 **variable redundancy.** Environmental variables with Spearman  $r^2 > 0.7$  are excluded

65 from subsequent analyses. LAT, latitude; ALT, altitude; MAP, mean annual

66 precipitation; EC, electrical conductivity; EX-Ca, exchangeable calcium; CEC, cation

67 exchange capacity; TC, total carbon; TN, total N; TP, total P; TK, total K.

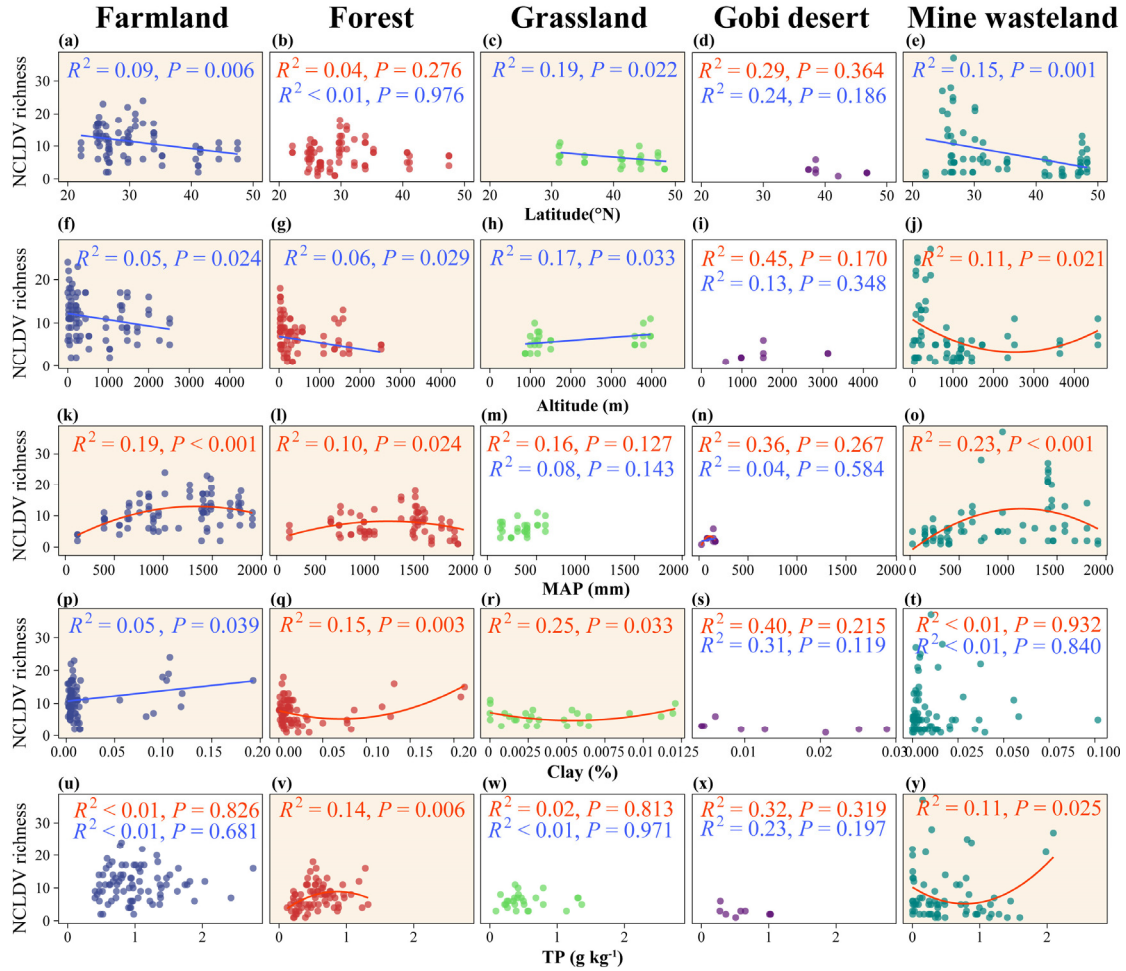

68

69 **Supplementary Figure 6. Relationships between selected environmental factors**

70 **and NCLDV phylotype richness in individual habitat types.** Colors of dots in each

71 panel represent habitat types. Each dot represents one soil sample. The solid blue lines

72 represent the linear regression with statistically significant Pearson coefficients. The

73 solid red curves represent the polynomial fit determined on the basis of the corrected

74 Akaike Information Criterion (AIC). Abbreviations are as those in Supplementary

75 Figure 4.

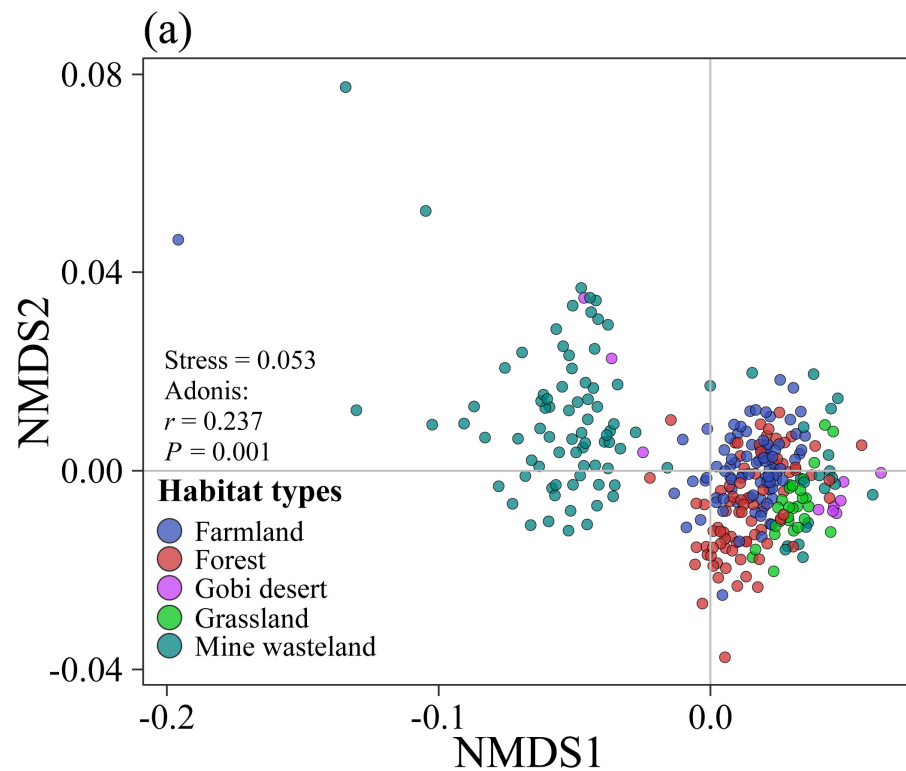

(b) **Multilevel pairwise comparison**

| Pairs                         | $R^2$ | $P.value$ | $P.adjusted$ |
|-------------------------------|-------|-----------|--------------|
| Forest vs Grassland           | 0.038 | 0.001     | 0.001        |
| Forest vs Mine wasteland      | 0.025 | 0.001     | 0.001        |
| Forest vs Farmland            | 0.021 | 0.001     | 0.001        |
| Forest vs Gobi desert         | 0.048 | 0.001     | 0.001        |
| Grassland vs Mine wasteland   | 0.033 | 0.001     | 0.001        |
| Grassland vs Farmland         | 0.041 | 0.001     | 0.001        |
| Grassland vs Gobi desert      | 0.117 | 0.001     | 0.001        |
| Mine wasteland vs Farmland    | 0.033 | 0.001     | 0.001        |
| Mine wasteland vs Gobi desert | 0.034 | 0.001     | 0.001        |
| Farmland vs Gobi desert       | 0.051 | 0.001     | 0.001        |

76

77 **Supplementary Figure 7. Relative similarity of all samples in NCLDV community composition.** (a) Non-metric multidimensional scaling

78 (NMDS) ordination biplot showing the relative similarity of all samples. Samples are grouped and color-coded by habitat types. All groups are

79 significantly different from each other as analyzed using Adonis ( $P = 0.001$ ). (b) Results of multilevel pairwise comparison between habitat types.

80 It was performed by pairwise.adonis from the package “pairwiseAdonis”.

81

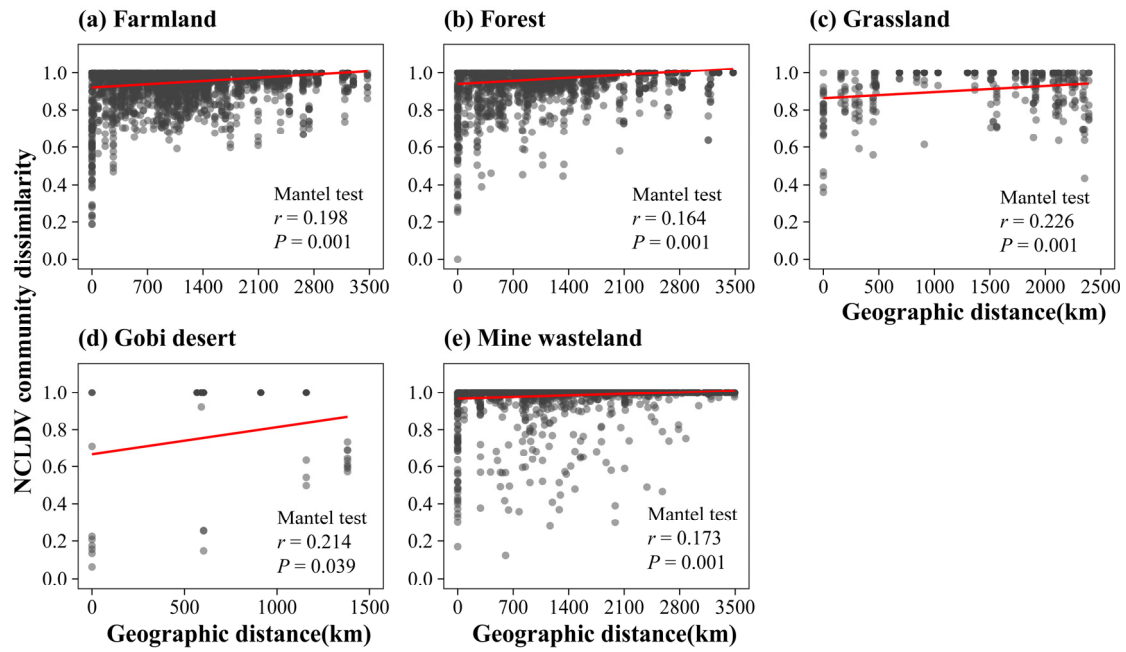

82

83 **Supplementary Figure 8. The distance–decay relationships for soil NCLDV**  
84 **communities in individual habitat types.** Pairwise NCLDV community dissimilarity  
85 (Bray-Curtis) significantly increases with pairwise geographic distance in the five  
86 habitat types: farmland (a), forest (b), grassland (c), Gobi desert (d) and mine wasteland  
87 (e).

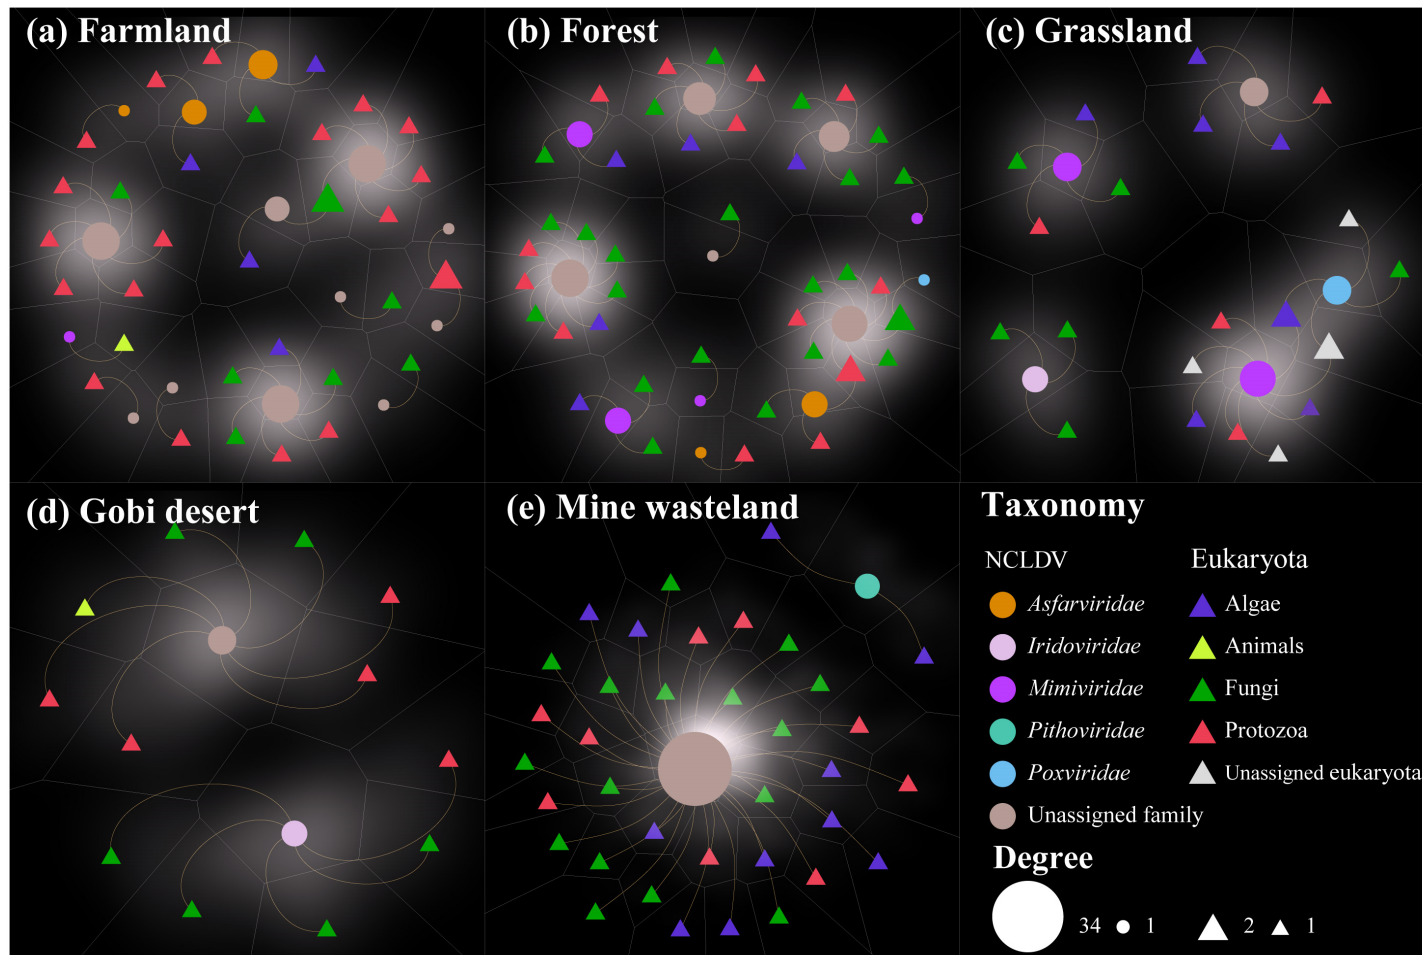

88

89 **Supplementary Figure 9. The co-occurrence networks of NCLDVs–eukaryotes in different habitat types.** Those NCLDV phylotypes and  
 90 eukaryotic amplicon sequence variants (ASVs) that were present in  $\geq 10\%$  of all soil samples for each habitat type were included in our co-

91 occurrence network analysis. Triangles represent eukaryotic ASVs and circles represent NCLDV phylotypes. The sizes of triangles and circles are  
92 proportional to the number of connections. Significant Spearman correlation coefficients ( $\rho \geq 0.60$ ,  $P < 0.05$ ) for NCLDVs-eukaryotes pairs are  
93 drawn as edges.

94



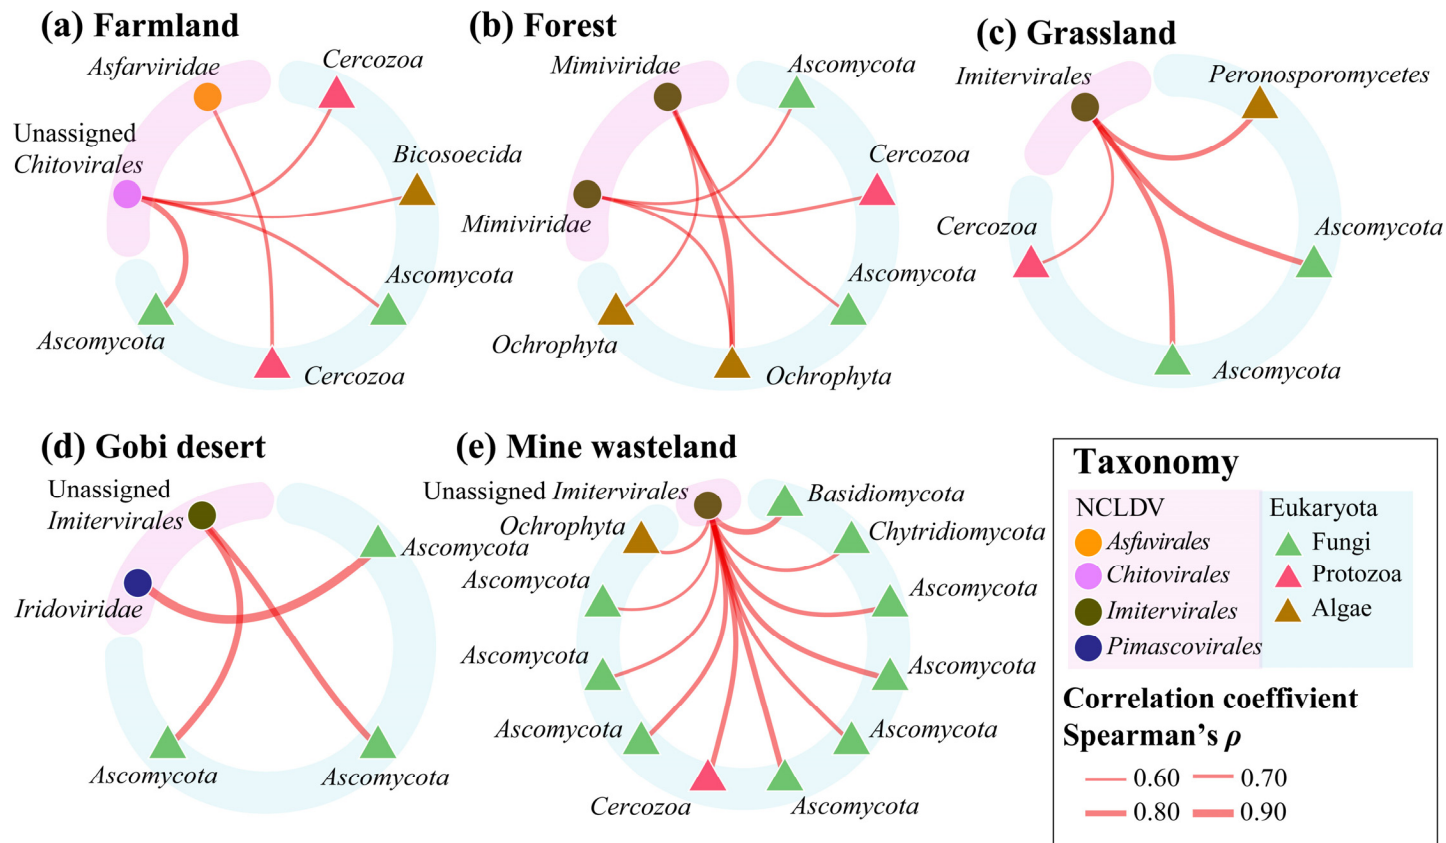

95

96 **Supplementary Figure 10. The co-occurrence networks of the 14 ubiquitous NCLDVs across four or five habitat types and eukaryotic**

97 **ASVs. Triangles represent eukaryotic ASVs and circles represent NCLDV phylotypes. Significant Spearman correlation coefficients ( $\rho \geq 0.60$ ,  $P$**

98  **$< 0.05$ ) for NCLDV-eukaryote pairs are drawn as edges.**

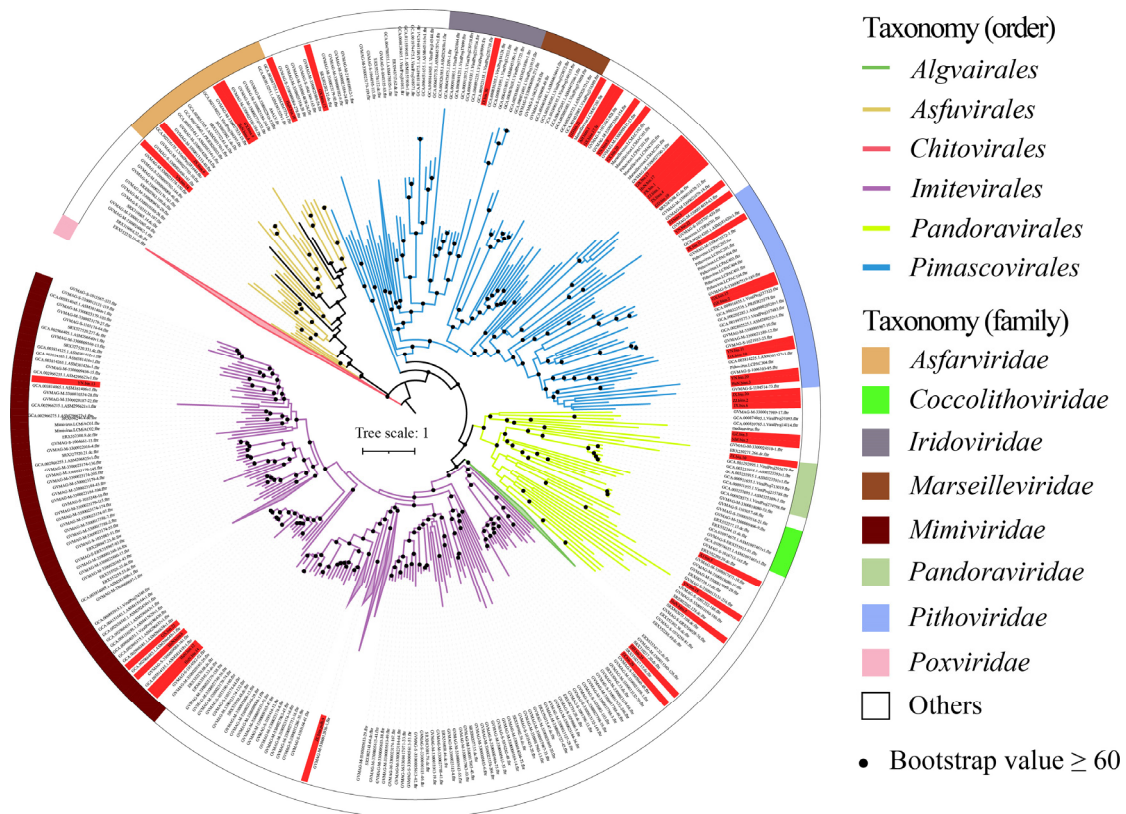

99

100 **Supplementary Figure 11.** The maximum-likelihood phylogenetic tree of giant virus  
 101 metagenome-assembled genomes (GVMAGs) reconstructed in this study and available  
 102 in public databases [2]. The tree was built from a concatenated protein alignment of  
 103 seven marker genes (SFII, RNAPL, PolB, TFIIB, TopoII, A32 and VLTF3) using the  
 104 model of LG+I+F+G4 and rooted at *Poxviridae* [2]. Tree branches are colored  
 105 according to the order-level taxonomic assignment. The GVMAGs recovered from this  
 106 study are labeled in red background. The outer strip is colored according to the family-  
 107 level taxonomic assignment. SFII, DEAD/SNF2-like helicase; RNAPL, DNA-  
 108 directed RNA polymerase alpha subunit; PolB, DNA polymerase family B; TFIIB,  
 109 transcription initiation factor IIB; TopoII, DNA topoisomerase II; A32, Packaging  
 110 ATPase; VLTF3, Poxvirus late transcription factor VLTF3.

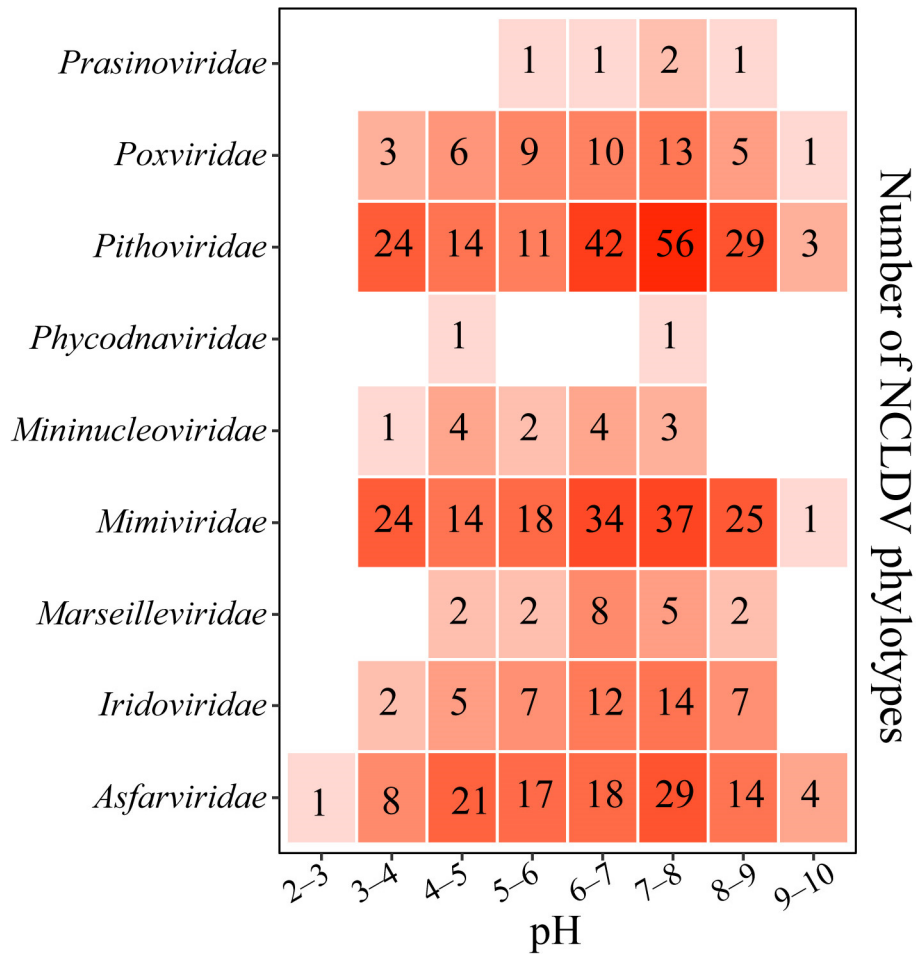

111  
 112 **Supplementary Figure 12. The pH-relevant distribution profiles of the numbers of**  
 113 **phylotypes belonging to individual NCLDV families.** The color intensity of a given  
 114 grid is proportionate to the number of NCLDV phylotypes belonging to a specific  
 115 family that can be observed in a given pH range. Given that some phylotypes can occur  
 116 in a wide range of soil pH, the sum of the numbers shown in the figure is greater than  
 117 the total number of the NCLDV phylotypes identified in this study.

118

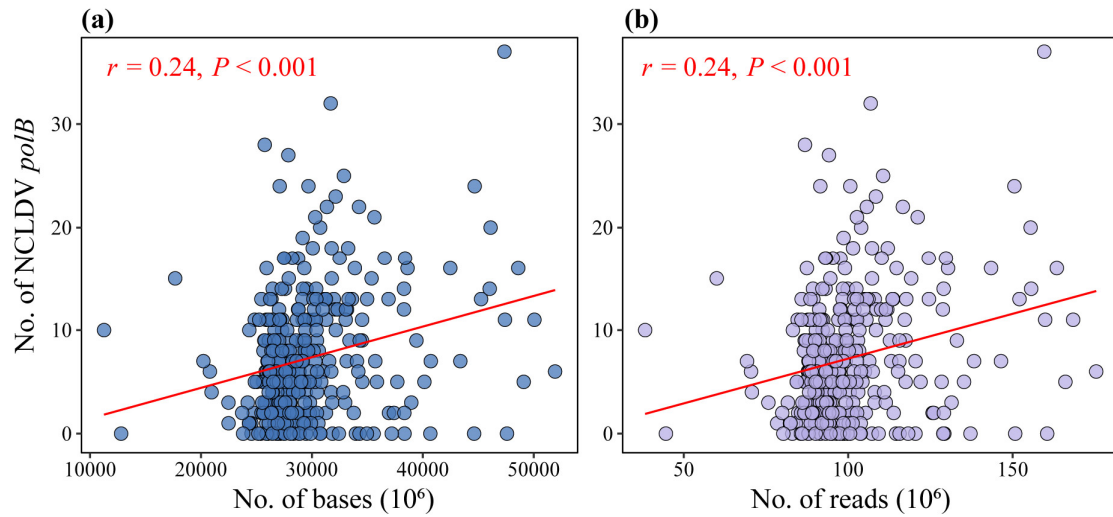

119

120 **Supplementary Figure 13. Relationships between and the number of NCLDV *polB***  
121 **genes detected in individual samples and sequencing depth.** Each dot in each panel  
122 represents one soil sample. The solid red lines represent the linear regression with  
123 statistically significant Pearson coefficients.

124 **Supplementary References**

- 125 1. Endo H, Blanc-Mathieu R, Li Y, Salazar G, Henry N, Labadie K, et al.  
126 Biogeography of marine giant viruses reveals their interplay with eukaryotes and  
127 ecological functions. *Nat Ecol Evol.* 2020;4(12):1639–1649.
- 128 2. Aylward FO, Moniruzzaman M, Ha AD, Koonin EV. A phylogenomic framework  
129 for charting the diversity and evolution of giant viruses. *PLoS Biol.*  
130 2021;19(10):e3001430.
